# Supplementary material for: Annexin A2 is a novel Cellular Redox Regulatory Protein involved in Tumorigenesis
Source: PubMed Central journal article supplement (PMC3282068; doi:10.18632/oncotarget.375), 2011-12-20
Supplement: oncotarget-02-1075-s003.pdf [file oncotarget-02-1075-s003.pdf]

## SUPPLEMENTARY TABLES

**Table S1**

EC<sub>50</sub> values for ANXA2 KD and control cells treated with H<sub>2</sub>O<sub>2</sub> and chemotherapeutic agents.

| <b>Cell line</b>  | <b>H<sub>2</sub>O<sub>2</sub> treatment (EC<sub>50</sub>)</b> | <b>Standard deviation (StDev)</b> |
|-------------------|---------------------------------------------------------------|-----------------------------------|
| MCF7 p36 shRNA2   | 1.07 mM                                                       | ± 0.056 mM                        |
| MCF7 p36 scramble | 4.377 mM                                                      | ± 0.707 mM                        |
| TIME p36 shRNA2   | 0.462 mM                                                      | ± 0.007 mM                        |
| TIME p36 scramble | 0.682 mM                                                      | ± 0.008 mM                        |
| LLC p36 shRNA3    | 0.797 mM                                                      | ± 0.178 mM                        |
| LLC p36 scramble  | 6.605 mM                                                      | ± 0.876 mM                        |
| <b>Cell line</b>  | <b>Etoposide treatment (EC<sub>50</sub>)</b>                  | <b>Standard deviation (StDev)</b> |
| MCF7 p36 shRNA2   | 0.189 µM                                                      | ± 0.019 µM                        |
| MCF7 p36 scramble | 0.645 µM                                                      | ± 0.296 µM                        |
| TIME p36 shRNA2   | 0.0163 µM                                                     | ± 0.005 µM                        |
| TIME p36 scramble | 0.133 µM                                                      | ± 0.053 µM                        |
| LLC p36 shRNA3    | 0.01 µM                                                       | ± 0.0015 µM                       |
| LLC p36 scramble  | 0.25 µM                                                       | ± 0.12 µM                         |
| <b>Cell line</b>  | <b>Tamoxifen treatment (EC<sub>50</sub>)</b>                  | <b>Standard deviation (StDev)</b> |
| MCF7 p36 shRNA2   | 12.5 µM                                                       | ± 3 µM                            |
| MCF7 p36 scramble | 17.1 µM                                                       | ± 1 µM                            |
| <b>Cell line</b>  | <b>Doxorubicin treatment (EC<sub>50</sub>)</b>                | <b>Standard deviation (StDev)</b> |
| TIME p36 shRNA2   | 4.85 µM                                                       | ± 0.5 µM                          |
| TIME p36 scramble | 31.2 µM                                                       | ± 10.6 µM                         |
| LLC p36 shRNA3    | 3.1 µM                                                        | ± 0.53 µM                         |
| LLC p36 scramble  | 36.2 µM                                                       | ± 2.6 µM                          |
